# Supplementary material for: Ag2S quantum dots in situ coupled to hexagonal SnS2 with enhanced photocatalytic activity for MO and Cr(vi) removal
Source: Royal Society of Chemistry journal article supplement (doi:10.1039/c7ra08369f), 2017-01-01
Supplement: c7ra08369f1.pdf [file c7ra08369f1.pdf]

## Ag<sub>2</sub>S quantum dot in-situ coupling to hexagonal SnS<sub>2</sub> with enhanced photocatalytic activity for MO and Cr (VI) removal

Jie Liu,<sup>a</sup> Liquan Jing,<sup>a</sup> Guofang Gao,<sup>a</sup> Yuanguo Xu,<sup>\*a</sup> Meng Xie,<sup>b</sup> Liying Huang,<sup>a</sup> HaiYan Ji,<sup>a</sup> Jimin Xie,<sup>\*a</sup> Huaming Li<sup>a</sup>

<sup>a</sup> School of Chemistry and Chemical Engineering, Institute for Energy Research, Jiangsu University, Zhenjiang 212013, PR China Corresponding author Email: \*xuyg@ujs.edu.cn; \*xiejm391@sohu.com.

<sup>b</sup> School of Pharmacy, Jiangsu University, Zhenjiang 212013, PR China

| samples                                 | Ag <sup>+</sup> (mg/L) | Sn <sup>4+</sup> (mg/L) |
|-----------------------------------------|------------------------|-------------------------|
| 0.5% Ag <sub>2</sub> S/SnS <sub>2</sub> | 0.102                  | 32.132                  |
| 1% Ag <sub>2</sub> S/SnS <sub>2</sub>   | 0.304                  | 31.953                  |
| 3% Ag <sub>2</sub> S/SnS <sub>2</sub>   | 0.924                  | 31.521                  |
| 5% Ag <sub>2</sub> S/SnS <sub>2</sub>   | 1.525                  | 30.769                  |

Table. S1 The measured concentration of Ag<sup>+</sup> and Sn<sup>4+</sup>

| samples                                 | Ag <sup>+</sup><br>(mmol) | Sn <sup>4+</sup><br>(mmol) | S <sup>2-</sup><br>(mmol) | Molar ratio     |                  |                 |
|-----------------------------------------|---------------------------|----------------------------|---------------------------|-----------------|------------------|-----------------|
|                                         |                           |                            |                           | Ag <sup>+</sup> | Sn <sup>4+</sup> | S <sup>2-</sup> |
| 0.5% Ag <sub>2</sub> S/SnS <sub>2</sub> | 0.00188                   | 0.54258                    | 1.094                     | 0.115%          | 33.115%          | 66.77%          |
| 1% Ag <sub>2</sub> S/SnS <sub>2</sub>   | 0.00560                   | 0.54084                    | 1.094                     | 0.341%          | 32.969%          | 66.689%         |
| 3% Ag <sub>2</sub> S/SnS <sub>2</sub>   | 0.01737                   | 0.53850                    | 1.094                     | 1.053%          | 32.639%          | 66.308%         |
| 5% Ag <sub>2</sub> S/SnS <sub>2</sub>   | 0.02898                   | 0.53028                    | 1.094                     | 1.753%          | 32.075%          | 66.172%         |

Table. S2 The content and molar ration of the elements for all samples.

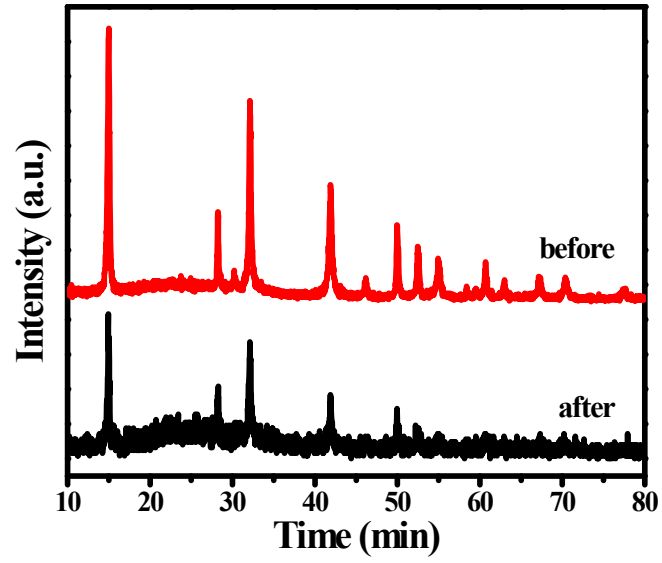

Fig. S1 XRD patterns of 1%  $\text{Ag}_2\text{S}/\text{SnS}_2$  composite before and after the cycling photocatalytic experiments.

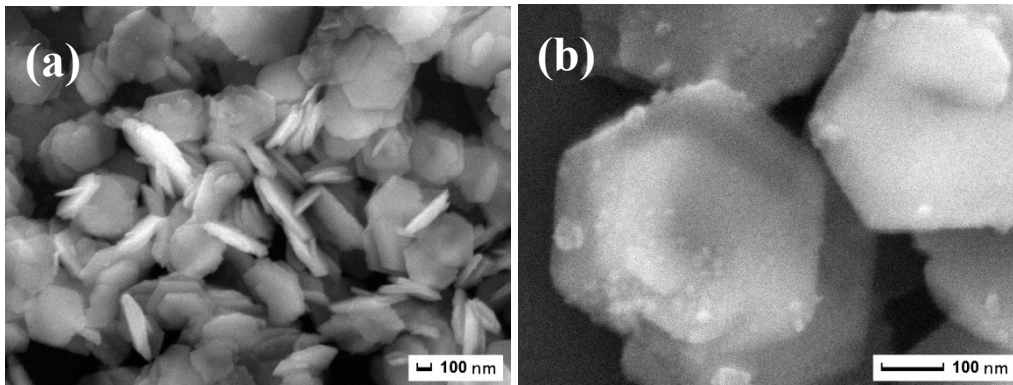

Fig. S2 SEM images of 1%  $\text{Ag}_2\text{S}/\text{SnS}_2$  composite after the cycling photocatalytic experiments.
